# Supplementary material for: Recalibrating Risk Prediction Models by Synthesizing Data Sources: Adapting the Lung Cancer PLCO Model for Taiwan
Source: Oxford University Press journal article supplement (doi:10.1158/1055-9965.epi-22-0281), 2022-09-21
Supplement: epi-22-0281_supplementary_figures_s1_and_s2_suppsf1-sf2.docx [file epi-22-0281_supplementary_figures_s1_and_s2_suppsf1-sf2.docx]

**Supplementary Figures**

Supplementary Figures demonstrate the predictive capacity of the risk model PLCOT-1 (Figure S1) and PLCOT-2 (Figure S2) assessed by the synthesized population of Taiwan cancer-free ever-smokers ages 50-74 in 2010.


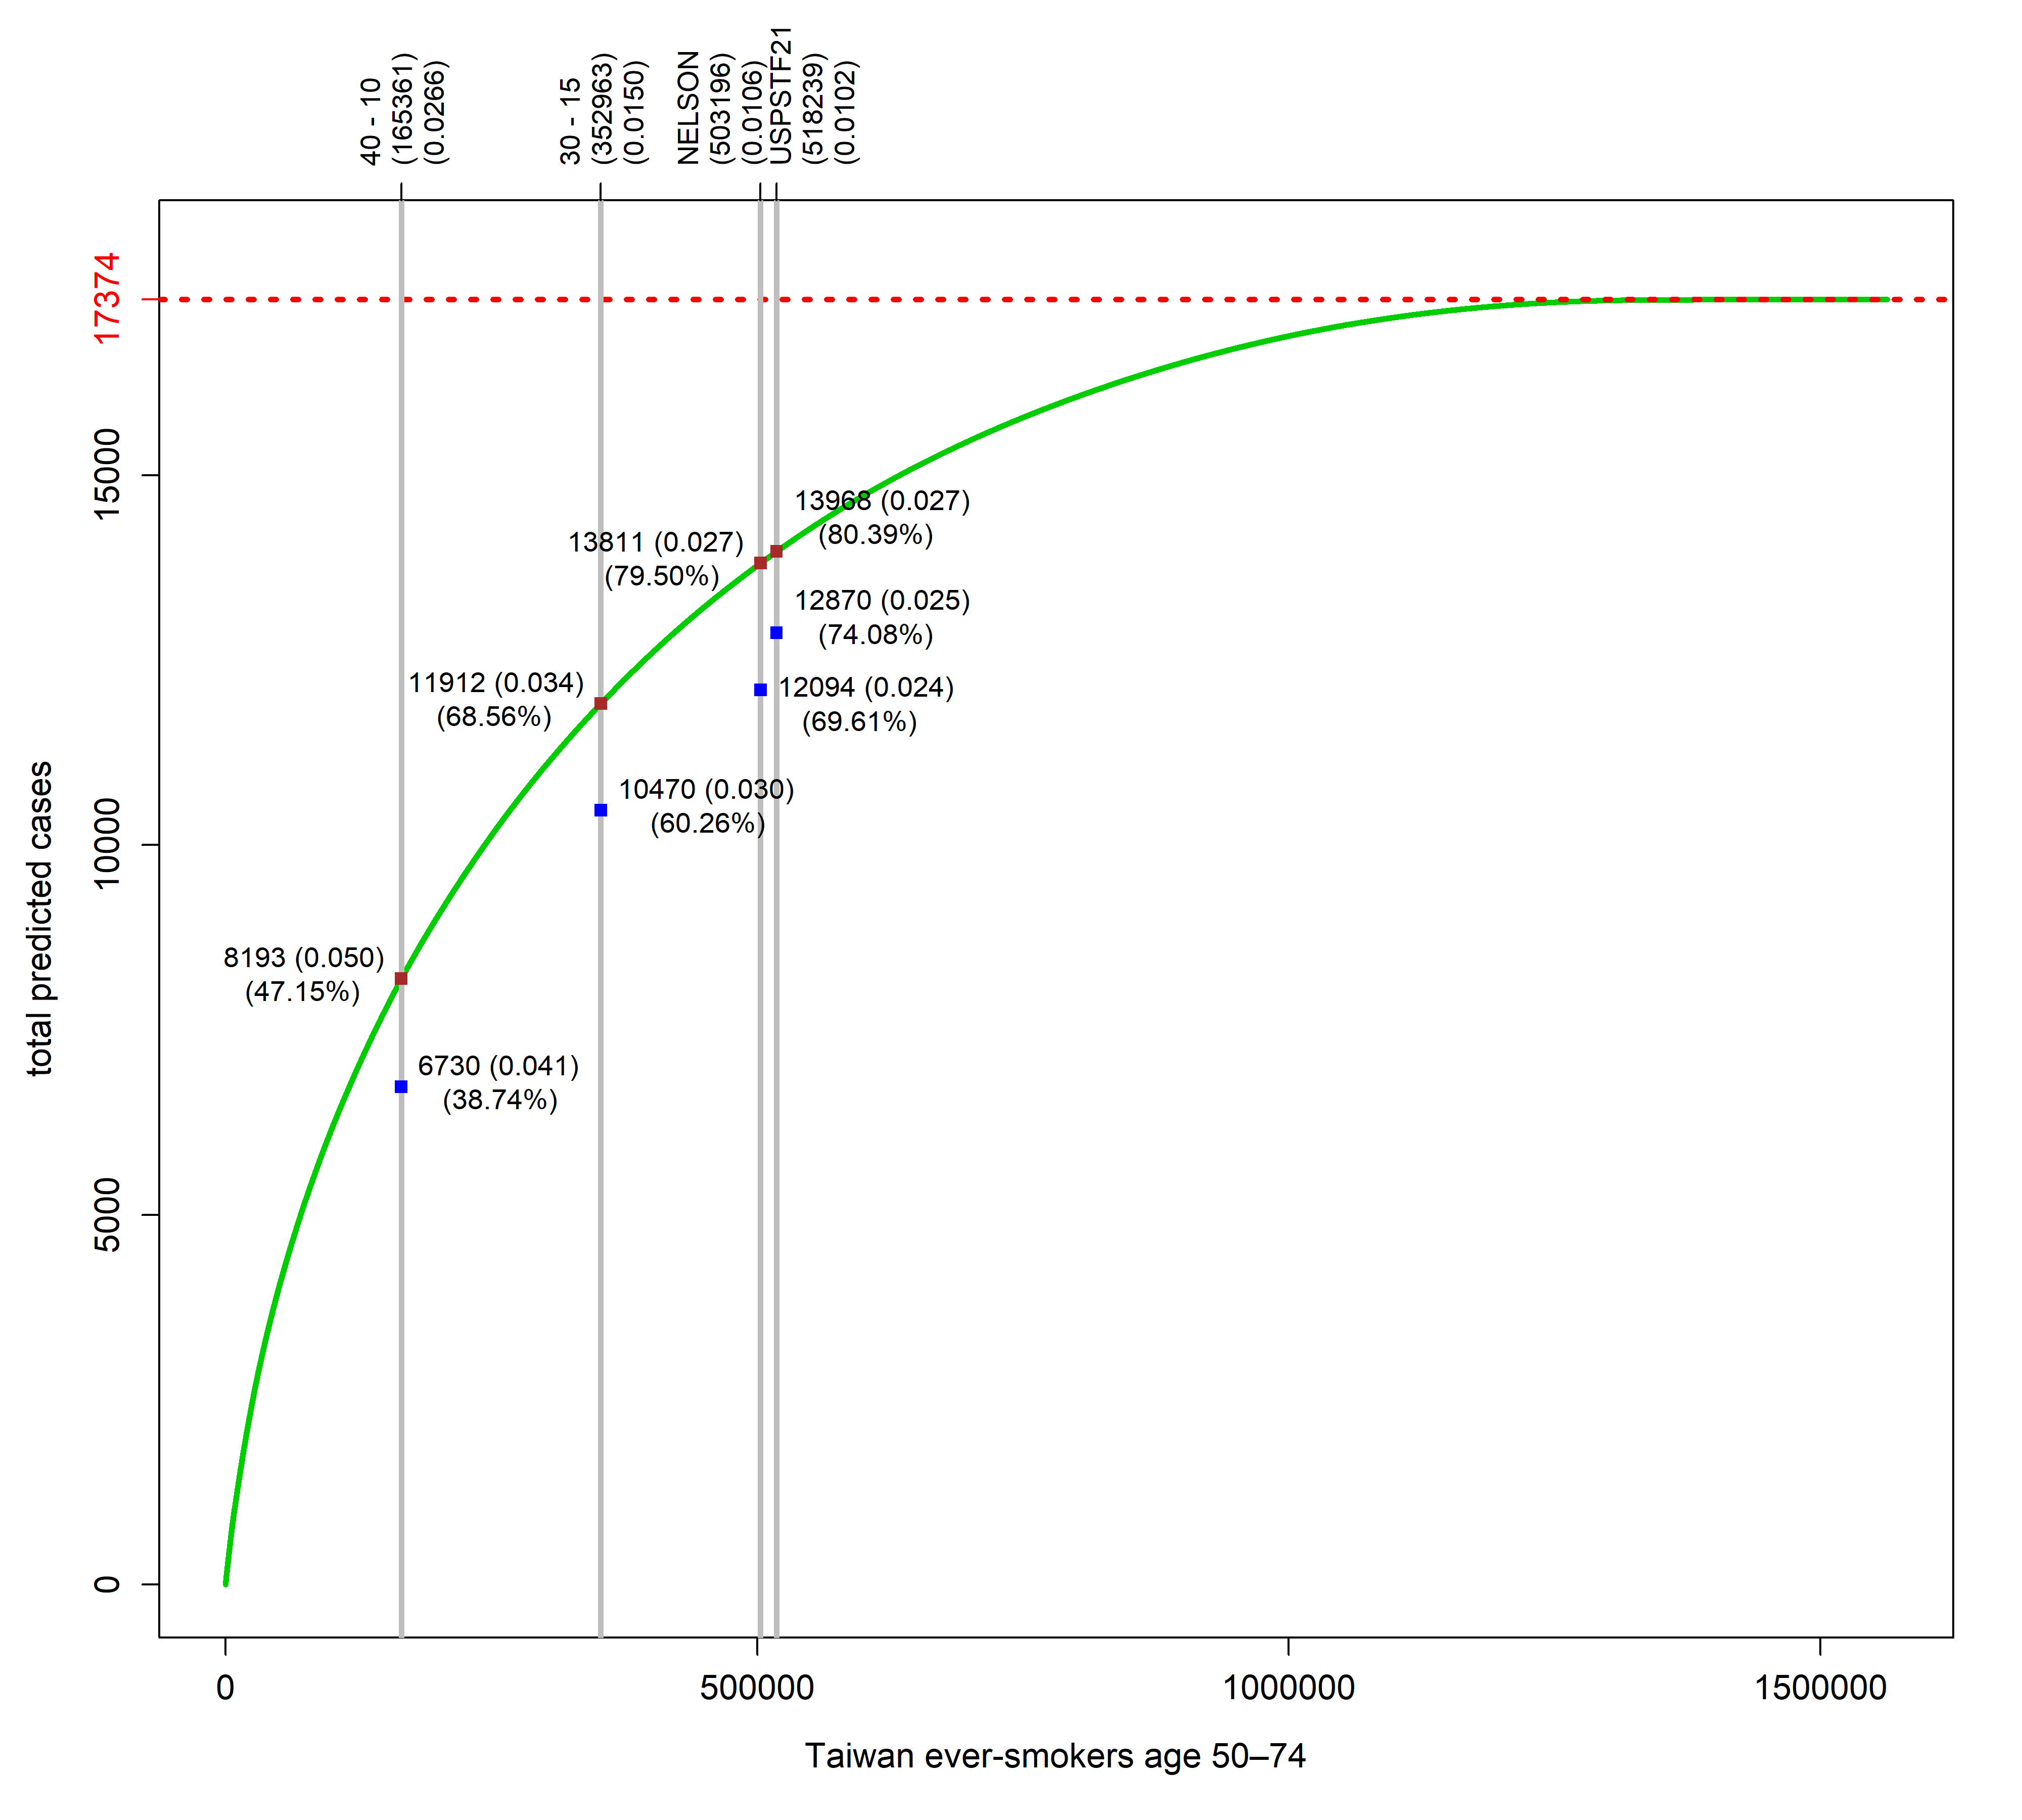


Figure S1. The predictive capacity of the risk model PLCOT-1 assessed by the synthesized population of Taiwan cancer-free ever-smokers ages 50-74 in 2010: the Lorenz curve plots predicted total lung cancer incidence against the numbers of individuals at highest risk based on the PLCOT-1 model.


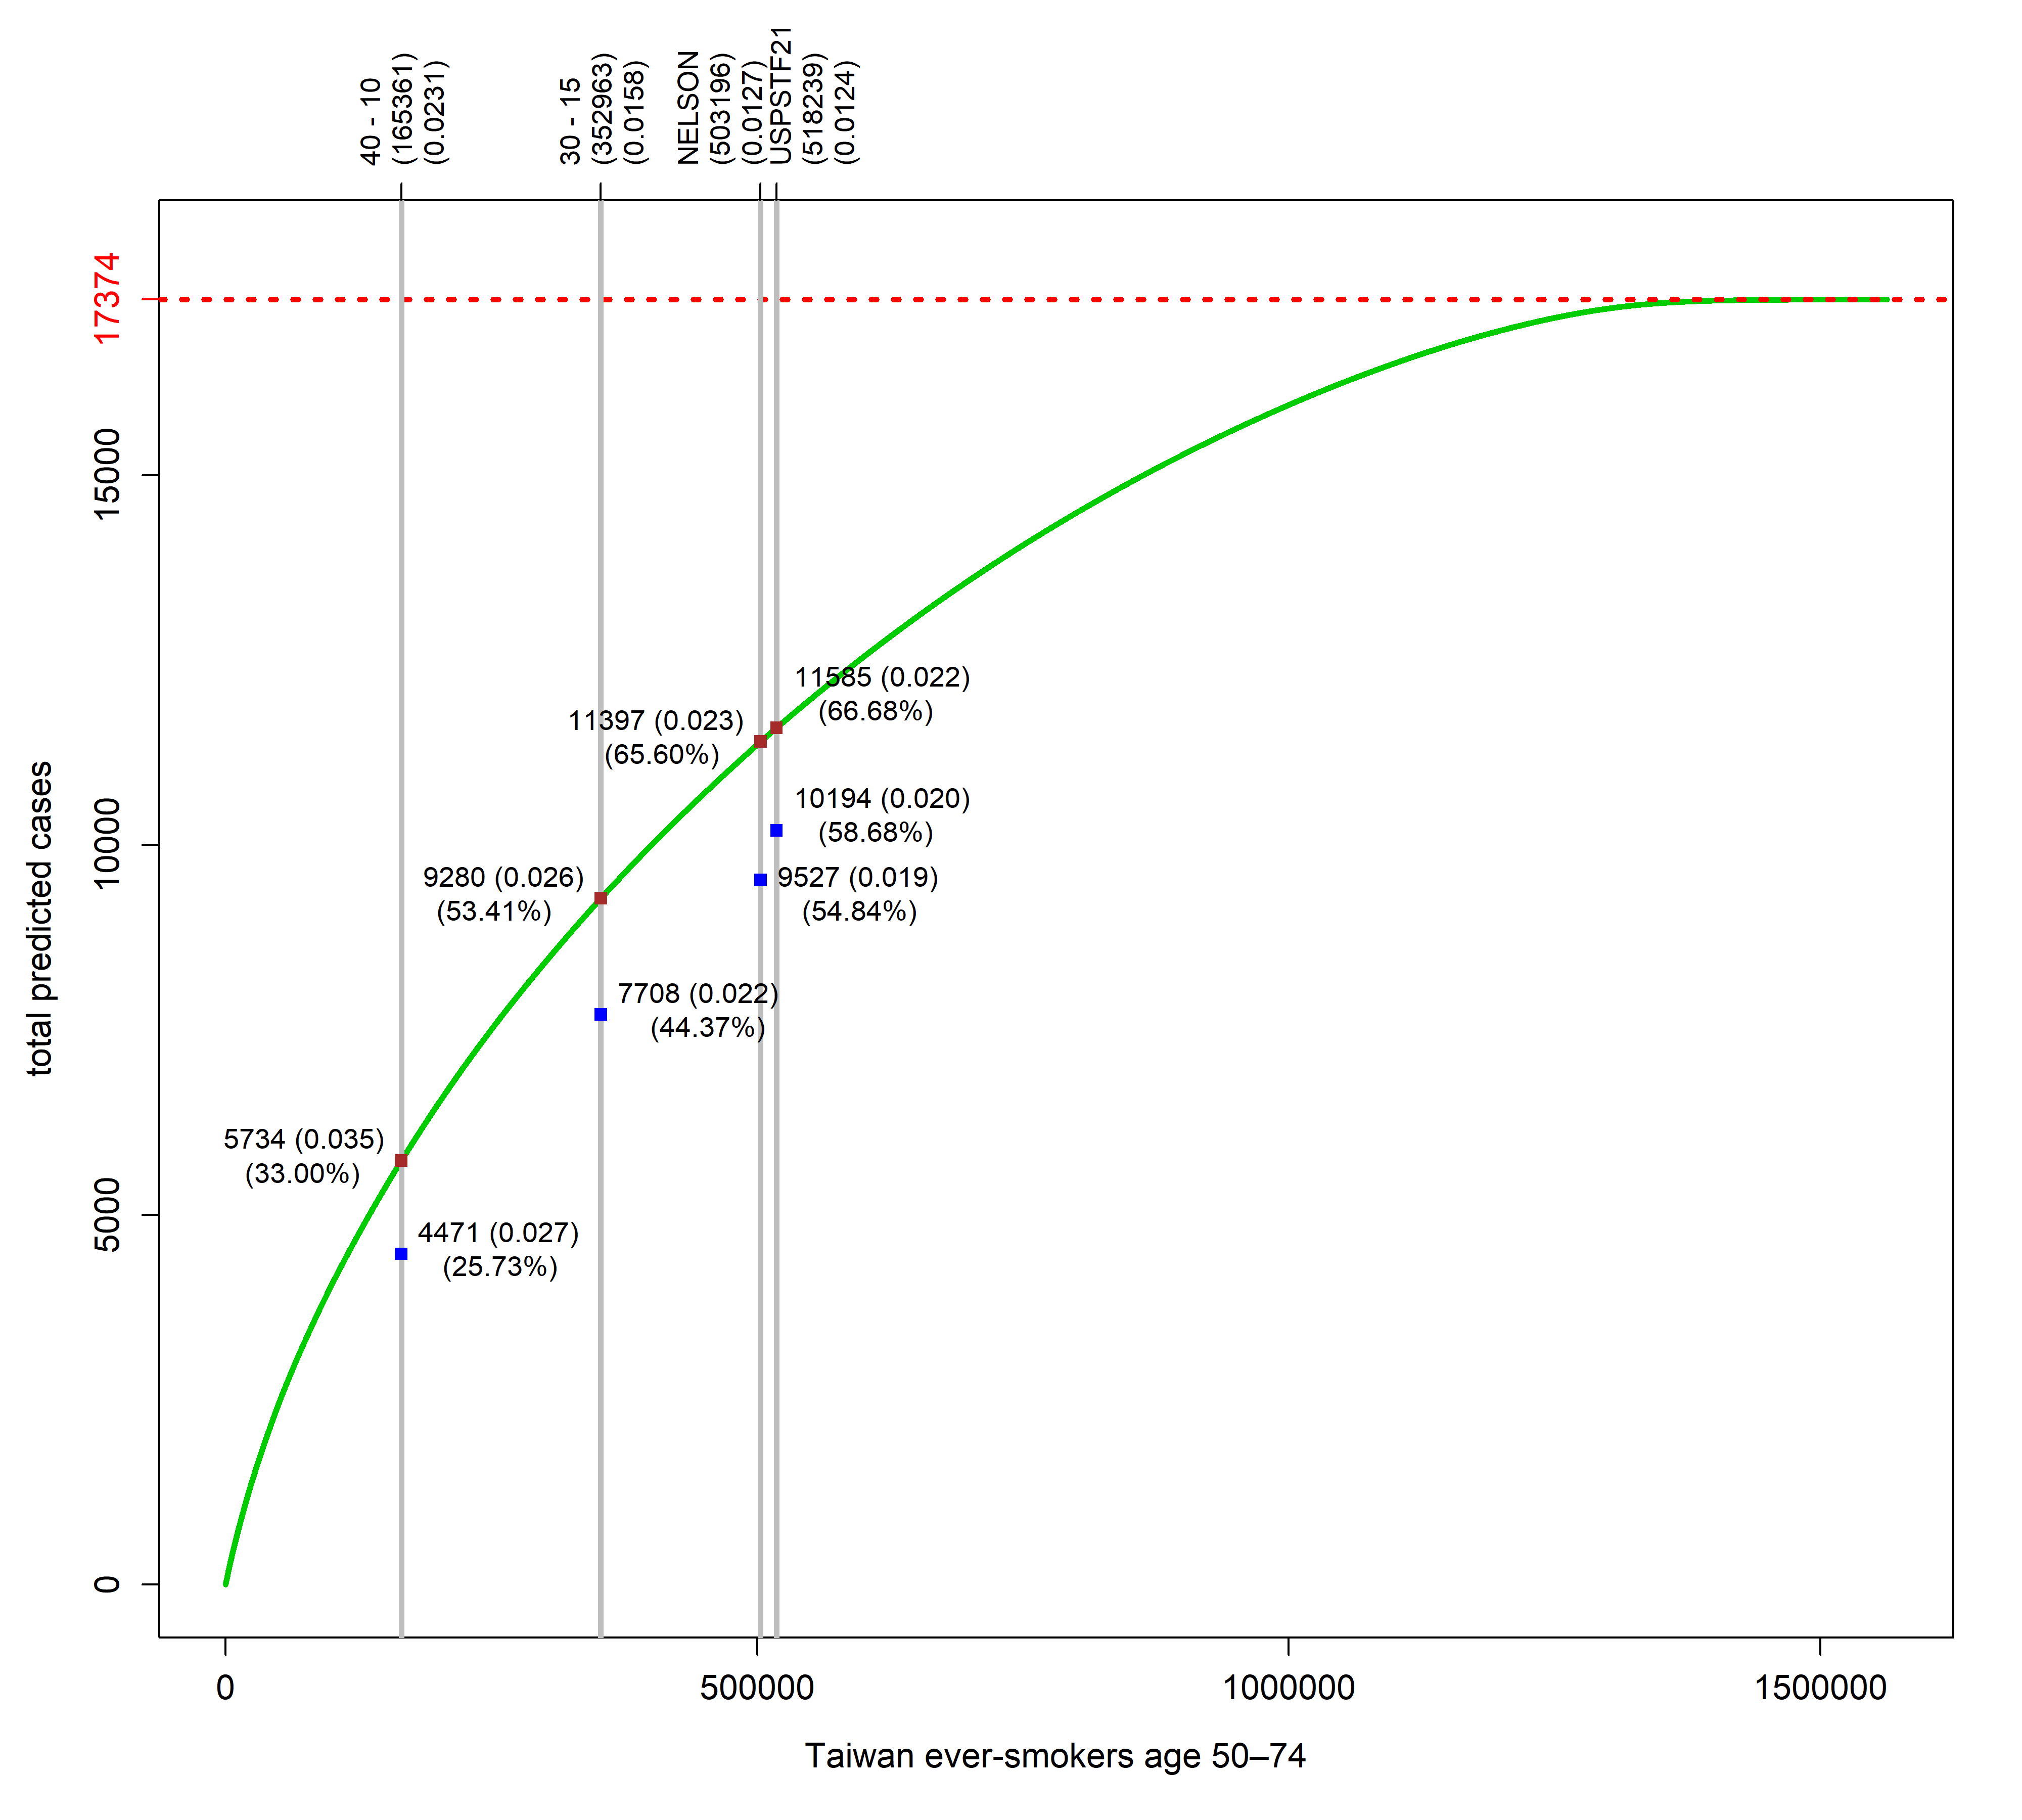


Figure S2. The predictive capacity of the risk model PLCOT-2 assessed by the synthesized population of Taiwan cancer-free ever-smokers ages 50-74 in 2010: the Lorenz curve plots predicted total lung cancer incidence against the numbers of individuals at highest risk based on the PLCOT-2 model.
